# Supplementary material for: PROMIS-29 and EORTC QLQ-C30: an empirical investigation towards a common conception of health
Source: Springer Nature journal article supplement (doi:10.1007/s11136-022-03324-7), 2023-01-09
Supplement: MOESM1 [file 23901076]

Electronic supplement to publication:

**PROMIS-29 and EORTC QLQ-C30 – an empirical investigation towards a common conception of health**

**Table I:** Descriptives (mean, standard deviation, normdata, kurtosis, skewness) of the included health domains

|                        |                       | PROMIS-29        |      |          |          | QLQ-C30          |                  |       |          |          |
|------------------------|-----------------------|------------------|------|----------|----------|------------------|------------------|-------|----------|----------|
|                        |                       | T-Score          | Norm | Kurtosis | Skewness | Raw-Score        | T-Score          | Norm  | Kurtosis | Skewness |
|                        |                       | Mean (SD)        |      |          |          | Mean (SD)        | Mean (SD)        |       |          |          |
| <i>Mental Health</i>   | Anxiety               | 56.19<br>(9.82)  | 53.1 | -0.49    | 0.06     |                  |                  |       |          |          |
|                        | Depression            | 51.52<br>(8.94)  | 52.7 | -0.45    | 0.42     |                  |                  |       |          |          |
|                        | Emotional function    |                  |      |          |          | 59.99<br>(27.53) | 44.17<br>(9.72)  | 50.63 | -0.77    | -0.38    |
|                        | Fatigue               | 47.85<br>(10.11) | 48.3 | -0.18    | 0.43     | 29.66<br>(26.94) | 51.52<br>(10.15) | 51.17 | -0.25    | 0.78     |
| <i>Physical Health</i> | Physical function     | 51.17<br>(7.61)  | 51.4 | 0.06     | -1.03    | 87.02<br>(18.34) | 50.68<br>(9.74)  | 48.33 | 2.78     | -1.77    |
|                        | Pain Interference     | 48.79<br>(8.93)  | 52.4 | 0.01     | 0.95     | 23.44<br>(27.48) | 50.18<br>(9.03)  | 50.84 | 0.53     | 1.17     |
|                        | Sleep disturbance     | 50.43<br>(8.95)  | 49.2 | -0.03    | 0.08     | 34.89<br>(33.91) | 54.22<br>(8.41)  | 50.96 | -0.86    | 0.56     |
| <i>Social Health</i>   | Social roles and acti | 54.04<br>(9.63)  | 50.8 | -0.60    | -0.57    |                  |                  |       | 0.64     | -1.27    |
|                        | Role function         |                  |      |          |          | 85.30<br>(26.23) | 48.96<br>(9.04)  | 49.13 | 2.77     | -1.90    |
|                        | Social function       |                  |      |          |          | 78.71<br>(28.10) | 47.86<br>(8.76)  | 49.93 |          |          |

**Table II:** Results of the Exploratory Factor Analysis with 5 factors, factor loadings are standardized

|    |                   |                          | oblmin 5 |         |         |          |         |           |
|----|-------------------|--------------------------|----------|---------|---------|----------|---------|-----------|
|    |                   |                          | PF       | Mental  | Fatigue | Pain     | Sleep   |           |
|    | Item Domain       | Item-ID                  | Factor1  | Factor2 | Factor3 | Factor 4 | Factor5 | community |
| 1  | PROMIS PF         | PROMIS29_PFA11           | -0,61    | -0,06   | 0,01    | -0,32    | -0,06   | 0,80      |
| 2  | PROMIS PF         | PROMIS29_PFA21           | -0,71    | 0,08    | -0,02   | -0,18    | -0,12   | 0,78      |
| 3  | PROMIS PF         | PROMIS29_PFA23           | -0,80    | 0,00    | 0,04    | -0,15    | -0,09   | 0,84      |
| 4  | PROMIS PF         | PFA53                    | -0,73    | -0,04   | -0,06   | -0,21    | -0,01   | 0,87      |
| 5  | PROMIS Anxiety    | PROMIS29_EDANX01         | -0,17    | 0,81    | 0,06    | 0,09     | 0,05    | 0,73      |
| 6  | PROMIS Anxiety    | EDANX40                  | -0,02    | 0,91    | -0,12   | 0,11     | 0,02    | 0,80      |
| 7  | PROMIS Anxiety    | PROMIS29_EDANX41         | -0,01    | 0,87    | -0,08   | 0,09     | 0,07    | 0,78      |
| 8  | PROMIS Anxiety    | EDANX53                  | -0,10    | 0,82    | 0,07    | 0,05     | 0,09    | 0,79      |
| 9  | PROMIS Depression | PROMIS29_EDDEP04         | 0,26     | 0,60    | 0,05    | -0,05    | 0,03    | 0,54      |
| 10 | PROMIS Depression | PROMIS29_EDDEP06         | 0,21     | 0,72    | 0,09    | -0,02    | 0,07    | 0,77      |
| 11 | PROMIS Depression | PROMIS29_EDDEP29         | 0,12     | 0,69    | 0,20    | -0,06    | 0,11    | 0,79      |
| 12 | PROMIS Depression | PROMIS29_EDDEP41         | 0,27     | 0,73    | 0,03    | -0,10    | 0,11    | 0,76      |
| 13 | PROMIS Fatigue    | PROMIS29_HI7             | 0,13     | 0,17    | 0,63    | 0,03     | 0,08    | 0,74      |
| 14 | PROMIS Fatigue    | PROMIS29_AN3             | 0,27     | 0,12    | 0,60    | -0,06    | 0,06    | 0,69      |
| 15 | PROMIS Fatigue    | PROMIS29_FATEXP41        | 0,07     | 0,15    | 0,68    | -0,01    | 0,12    | 0,73      |
| 16 | PROMIS Fatigue    | PROMIS29_FATEXP40        | 0,09     | 0,14    | 0,69    | 0,04     | 0,08    | 0,77      |
| 17 | PROMIS Sleep      | PROMIS29_SLEEP109        | -0,01    | -0,02   | -0,06   | -0,10    | 0,94    | 0,75      |
| 18 | PROMIS Sleep      | PROMIS29_SLEEP116        | 0,04     | -0,05   | 0,08    | -0,06    | 0,80    | 0,65      |
| 19 | PROMIS Sleep      | PROMIS29_SLEEP20         | -0,06    | 0,09    | -0,03   | 0,05     | 0,88    | 0,82      |
| 20 | PROMIS Sleep      | PROMIS29_SLEEP44         | 0,04     | 0,16    | -0,10   | 0,03     | 0,72    | 0,60      |
| 21 | PROMIS Social     | PROMIS29_SRPPER11_CAPS   | -0,51    | -0,31   | -0,24   | -0,04    | -0,01   | 0,72      |
| 22 | PROMIS Social     | PROMIS29_SRPPER18_CAPS   | -0,51    | -0,28   | -0,25   | -0,04    | -0,01   | 0,71      |
| 23 | PROMIS Social     | PROMIS29_SRPPER23_CAPS   | -0,53    | -0,27   | -0,32   | -0,02    | -0,02   | 0,80      |
| 24 | PROMIS Social     | PROMIS29_SRPPER46_CAPS   | -0,56    | -0,30   | -0,29   | 0,01     | 0,02    | 0,79      |
| 25 | PROMIS Pain       | PROMIS29_PAININ9         | 0,02     | 0,14    | -0,05   | 0,90     | 0,03    | 0,90      |
| 26 | PROMIS Pain       | PROMIS29_PAININ22        | 0,23     | 0,10    | -0,06   | 0,76     | 0,01    | 0,87      |
| 27 | PROMIS Pain       | PROMIS29_PAININ31        | 0,28     | 0,11    | 0,00    | 0,64     | 0,06    | 0,83      |
| 28 | PROMIS Pain       | PROMIS29_PAININ34        | 0,23     | 0,06    | -0,04   | 0,73     | 0,07    | 0,87      |
| 29 | EORTC PF          | EORTCQLQC30_Q01          | 0,61     | -0,08   | 0,10    | 0,15     | 0,14    | 0,66      |
| 30 | EORTC PF          | EORTCQLQC30_Q02          | 0,68     | -0,17   | 0,04    | 0,19     | 0,18    | 0,78      |
| 31 | EORTC PF          | EORTCQLQC30_Q03          | 0,75     | -0,08   | 0,05    | 0,09     | 0,07    | 0,73      |
| 32 | EORTC PF          | EORTCQLQC30_Q04          | 0,47     | -0,09   | 0,26    | 0,19     | 0,04    | 0,59      |
| 33 | EORTC PF          | EORTCQLQC30_Q05          | 0,68     | 0,19    | 0,00    | 0,04     | -0,13   | 0,55      |
| 34 | EORTC RF          | EORTCQLQC30_Q06          | 0,45     | 0,02    | 0,20    | 0,33     | 0,05    | 0,74      |
| 35 | EORTC RF          | EORTCQLQC30_Q07          | 0,39     | -0,03   | 0,24    | 0,39     | -0,02   | 0,70      |
| 36 | EORTC PA          | EORTCQLQC30_Q09          | -0,04    | -0,09   | 0,12    | 0,71     | 0,07    | 0,57      |
| 37 | EORTC PA          | EORTCQLQC30_Q19          | -0,05    | -0,04   | 0,17    | 0,84     | 0,06    | 0,83      |
| 38 | EORTC SL          | EORTCQLQC30_Q11          | 0,00     | -0,03   | 0,08    | 0,09     | 0,83    | 0,81      |
| 39 | EORTC FA          | EORTCQLQC30_Q10          | 0,26     | -0,11   | 0,48    | 0,36     | -0,01   | 0,76      |
| 40 | EORTC FA          | EORTCQLQC30_Q12          | 0,18     | -0,10   | 0,59    | 0,24     | 0,20    | 0,84      |
| 41 | EORTC FA          | EORTCQLQC30_Q18          | -0,04    | -0,18   | 0,81    | 0,18     | 0,10    | 0,76      |
| 42 | EORTC EF          | EORTCQLQC30_Q21          | -0,15    | 0,37    | 0,51    | 0,05     | 0,10    | 0,62      |
| 43 | EORTC EF          | EORTCQLQC30_Q22          | -0,23    | 0,55    | 0,31    | 0,15     | 0,07    | 0,61      |
| 44 | EORTC EF          | EORTCQLQC30_Q23          | -0,11    | 0,37    | 0,49    | 0,05     | 0,02    | 0,53      |
| 45 | EORTC EF          | EORTCQLQC30_Q24          | -0,13    | 0,51    | 0,45    | 0,07     | 0,15    | 0,78      |
| 48 | EORTC SF          | EORTCQLQC30_Q26          | 0,18     | 0,34    | 0,30    | 0,19     | 0,02    | 0,60      |
| 49 | EORTC SF          | EORTCQLQC30_Q27          | 0,24     | 0,28    | 0,37    | 0,22     | -0,05   | 0,68      |
|    |                   |                          |          |         |         |          |         |           |
|    |                   | Correlation with Factor1 | 1        | 0,25    | 0,47    | 0,67     | 0,31    |           |
|    |                   | Correlation with Factor2 |          | 1       | 0,48    | 0,26     | 0,42    |           |
|    |                   | Correlation with Factor3 |          |         | 1       | 0,47     | 0,46    |           |
|    |                   | Correlation with Factor4 |          |         |         | 1        | 0,42    |           |
|    |                   | Correlation with Factor5 |          |         |         |          | 1       |           |
